# Supplementary figures and images for: ART Suppresses Plasma HIV-1 RNA to a Stable Set Point Predicted by Pretherapy Viremia
Source: PLOS journal article supplement (doi:10.1371/journal.ppat.0030046), 2007-04-04

**Supplemental Figure 1. Subjects from trial M98-863 studied by longitudinal analysis**

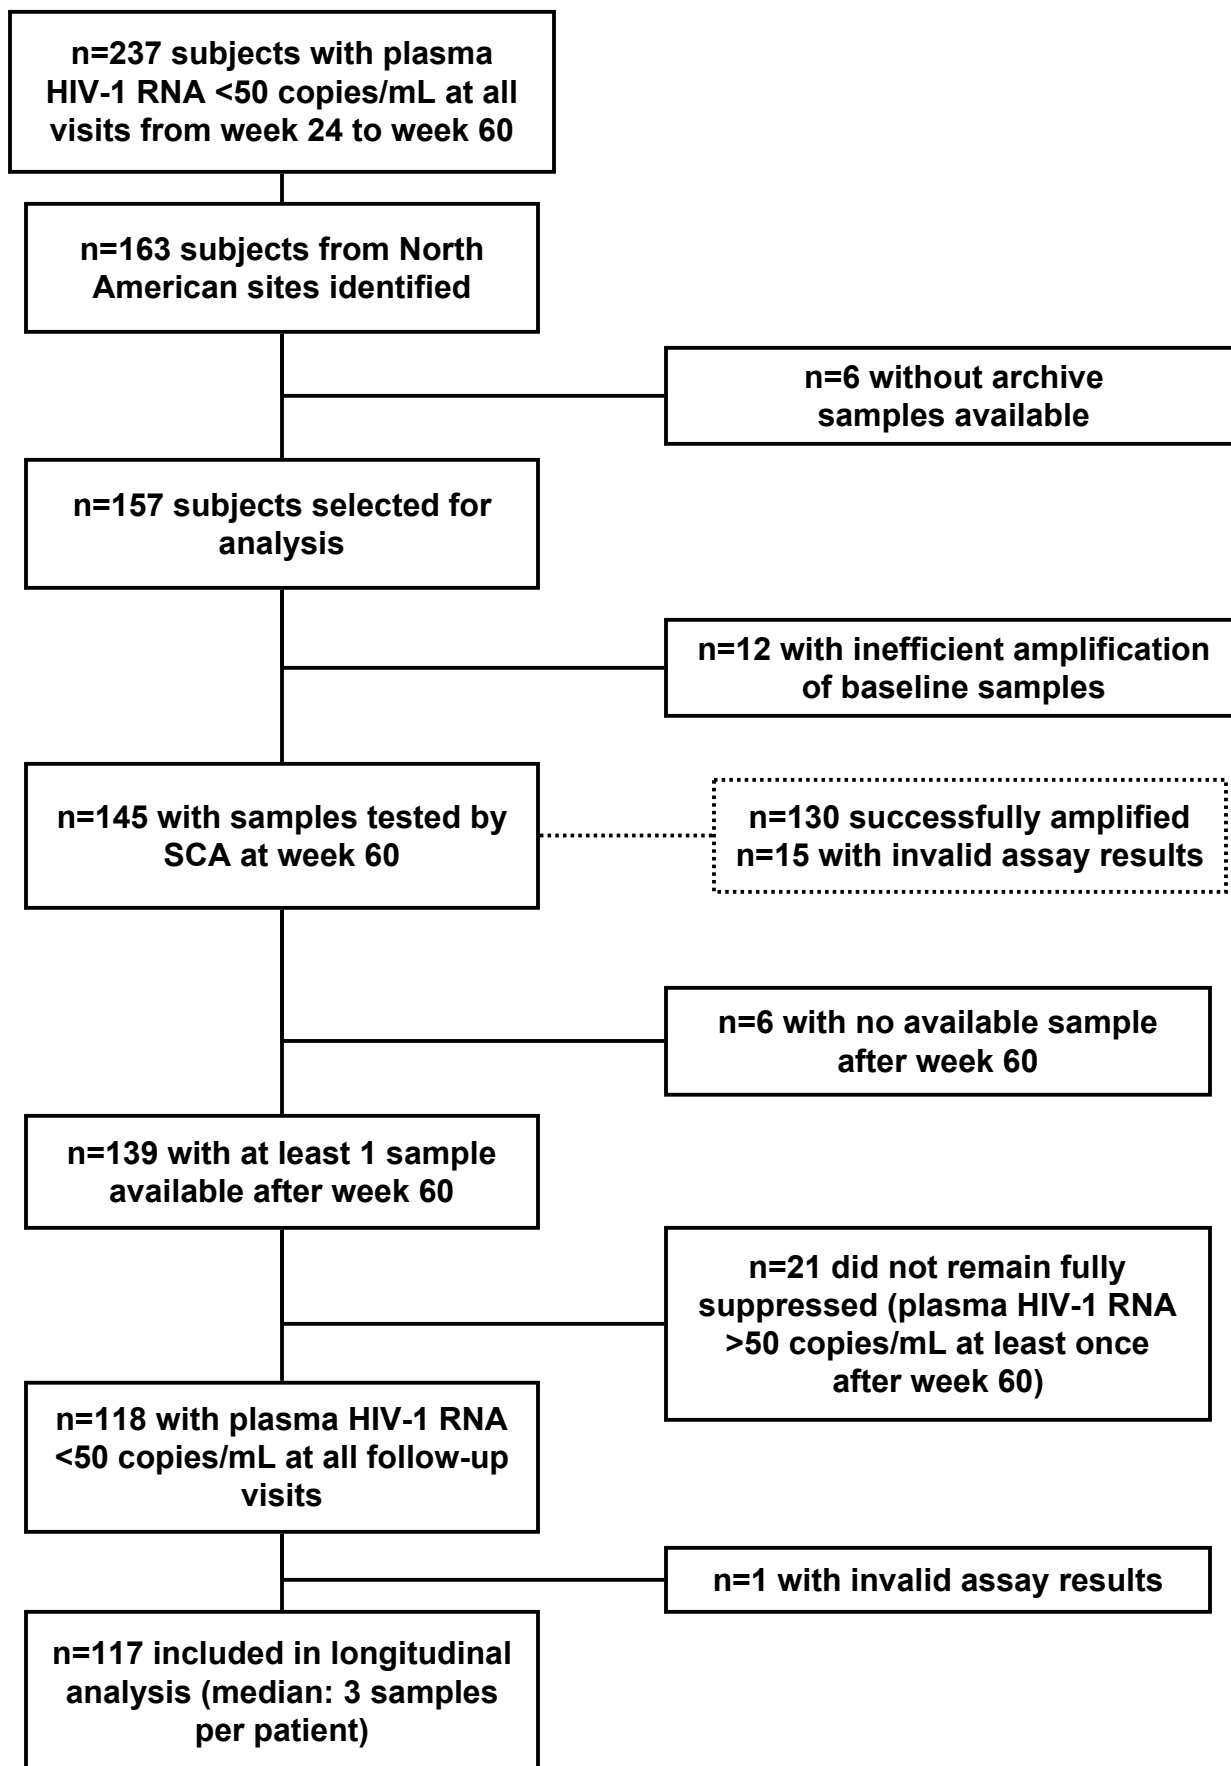

Supplement: S1 (10.1371/journal.ppat.0030046.s001) [file journal.ppat.0030046.s001]
